# Supplementary material
Source: Springer Nature journal article supplement (https://www.springermedizin.de/resource/supplementary/12911_2007_154_MOESM4_ESM.pdf/9527250)
Supplement: MOESM4 [file 9527250]

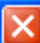

## Include/Exclude Clinical Options

Include/Exclude Clinical Options:

Included Clinical Options:

Magnetic Resonance Imaging (MRI) <<0  
Electrical Impedance Scanning <<0.38//(  
electronic resonance spectroscopy of al  
SCM Test <<0.81//0.85//\$100.0>>  
serum TSGF <<0.6386//0.9089//\$100.0  
"SELDI (serum), CART, two surfaces" <<  
scintimammography on px w/suspicious b  
"NAS bFGF, race, menopausal status + F  
"cytology along, breast ductal lavage cel  
"G-actin biomarker, breast ductal lavage  
"DNA5cER biomarker, breast ductal lavaç  
mammaglobin (cutpoint 8.8) <<0.688//0

>>

<<

Excluded Clinical Options:

Cancel

Help

OK
